# Supplementary material
Source: PubMed Central journal article supplement (PMC3807438)
Supplement: JB.00411-13_zjb999092853so1.pdf [file JB.00411-13_zjb999092853so1.pdf]

## Supplementary Materials

### Confirmation of the Ech and HynAB deletion mutants by PCR and Southern-blot analyses

For confirmation of the deletion of the *echBC* and *hynAB* genes, Southern-blot analyses were performed using gDNA from *D. gigas* wild-type and the respective mutant strains extracted with Wizard Genomic DNA Purification Kit (Promega).

For the  $\Delta hynAB$  deletion, *BclI* (Roche) was used for the digestion of  $\sim 3\mu\text{g}$  of *D. gigas* wild type and  $\Delta hynAB$  strain gDNA. A probe for the  $\sim 1\text{kb}$  upstream region of the *hynA* gene was amplified using *Phusion* High-fidelity DNA polymerase (Thermo Scientific). Southern blotting, prehybridisation and hybridisation were carried out using the DIG High Prime DNA labeling and Detection Starter kit II (Roche), according to the manufactures protocol. The replacement of the *hynAB* genes for the *kanR* gene creates a new restriction site for *BclI* enzyme generating bands of different sizes. The results showed the expected higher size for the positive band in the *D. gigas* WT (4635bp) and a smaller size for the positive band in the  $\Delta hynAB$  mutated strain (1623bp) as shown in Fig. S1.A.

In the case of the Ech mutation,  $\sim 2\mu\text{g}$  of *D. gigas* wild-type and  $\Delta echBC$  gDNA was digested with *NcoI* (Fermentas). Specific probes for *echBC* and the *kanR* genes were amplified using *Taq* DNA polymerase (Invitrogen) and labeled with  $[32\text{P}]\text{dATP}$ . Southern blotting, prehybridisation and hybridisation were carried out as described in [1]. Hybridisation with the *echBC* probe resulted in a single positive band of the expected size (2752bp) only in the lane corresponding to *D. gigas* wild-type, whereas hybridisation with the *kan<sup>R</sup>* probe

26 resulted in two positive bands of the predicted size (1230bp and 1623pb) only in  
27 the lane corresponding to *D. gigas*  $\Delta echBC$ , as shown in Fig. S1.B.

28 Further confirmation was performed through PCR analyses using ~200ng  
29 of gDNA from *D. gigas* wild-type or the respective mutant strains as templates  
30 and specific oligonucleotides amplifying for the regions of interest (Table.S1). In  
31 the case of the  $\Delta echBC$  mutant strain, PCR products of the expected size in *D.*  
32 *gigas* wild-type were obtained only with the primers for *echBC* (Fig.S2.A). In the  
33 *D. gigas*  $\Delta echBC$  strain amplification was observed only with the primers for  
34 *kan<sup>R</sup>*. Likewise, in the  $\Delta hynAB$  mutant strain, amplification of the *hynAB* locus  
35 showed PCR products of the expected sizes in the *D. gigas* wild-type and in the  
36 *D. gigas*  $\Delta hynAB$  strain (Fig.S2.B). The difference in size of the amplified bands  
37 is due to the fact that the *kan<sup>R</sup>* gene has only ~1.5kb's, whereas the *hynAB*  
38 genes have ~2.5kb's. Furthermore, specific primers to amplify the *kan<sup>R</sup>* genes  
39 presented PCR product of the expected size in the *D. gigas*  $\Delta hynAB$  (1415bp),  
40 while for the wild type no amplification was observed (Fig.S2.B).

41 The results obtained by both PCR and Southern-blot confirmed the  
42 deletion of the *echBC* and *hynAB* genes and their replacement with the *kan<sup>R</sup>*  
43 gene, creating two single mutant strains containing one hydrogenase each.

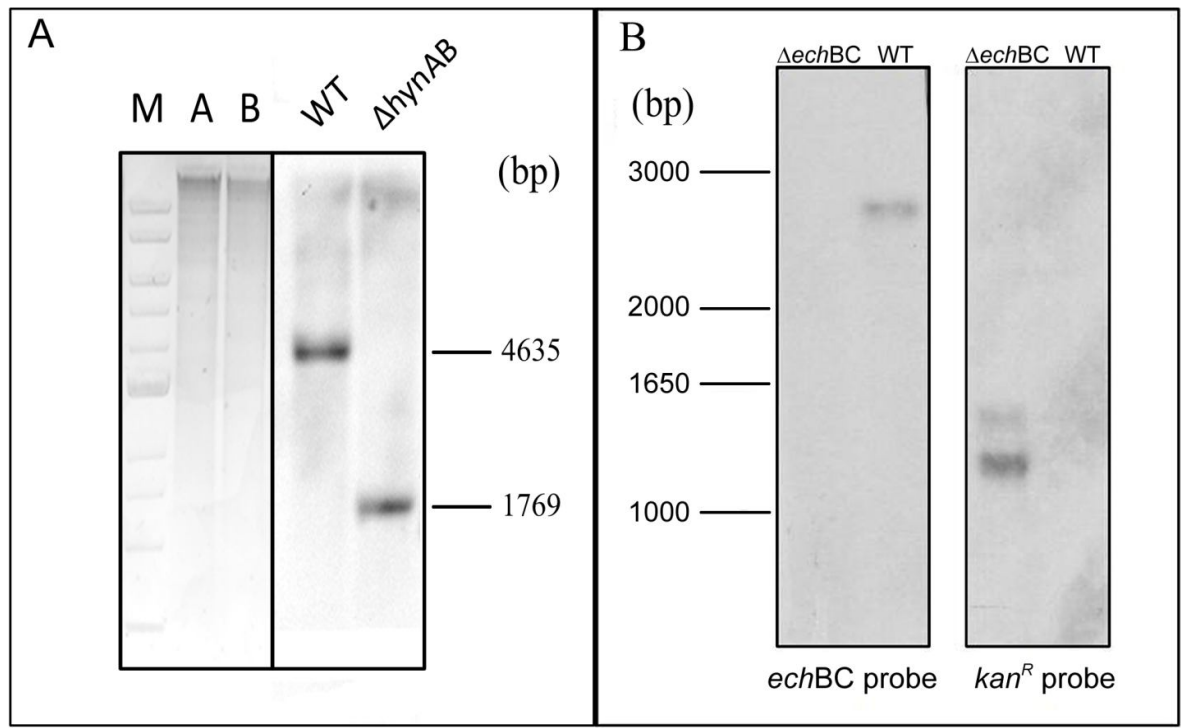

44

45 **Fig.S1:** Confirmation of *echBC* and *hynAB* deletions. A- Southern-blot analysis  
 46 of *BclI*-digested genomic DNA from *D. gigas* wild type and  $\Delta hynAB$  strains.  
 47 Expected band sizes are as follows: 4635bp for WT and 1769bp for the  
 48  $\Delta hynAB$ . B- Southern-blot analysis of *NcoI* digested genomic DNA from *D.*  
 49 *gigas* wild-type and  $\Delta echBC$  strains. Expected radio-labeled bands are as  
 50 follows:  $\Delta echBC$  (*echBC* probe), none; WT (*echBC* probe), 2752bp;  $\Delta echBC$   
 51 (*kanR* probe), 1230bp and 1623bp; WT (*kanR* probe), none.

52

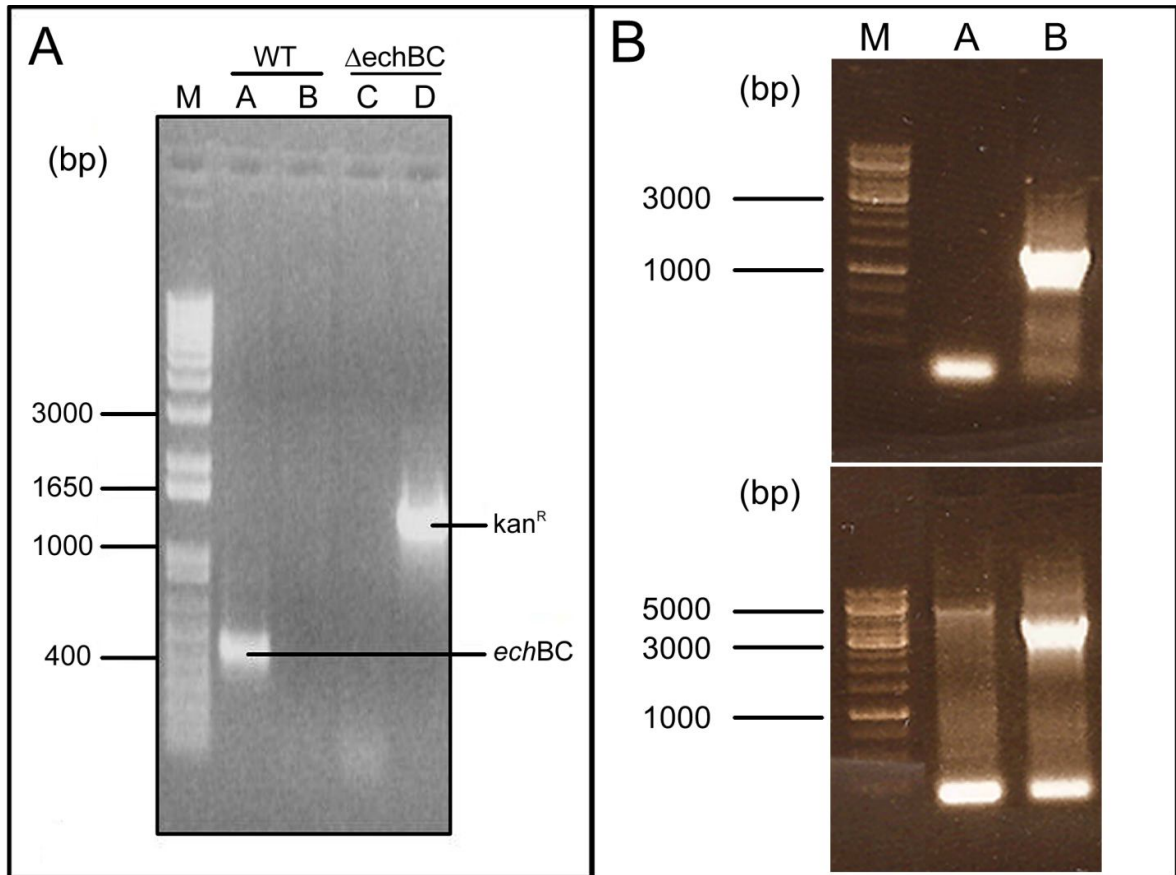

53

54 **Fig.S2:** Confirmation of *echBC* and *hynAB* deletion by PCR analysis: A- PCR  
 55 products amplified from *D. gigas* wild-type and  $\Delta echBC$  genomic DNA are as  
 56 follows: Lane A- WT (EchBC-1/EchBC-2), 422bp; Lane B- WT (EchKan<sup>R</sup>Xbal-  
 57 fwd / EchKan<sup>R</sup>Xbal-rev), none; Lane C-  $\Delta echBC$  (EchBC-1/EchBC-2), none;  
 58 Lane D-  $\Delta echBC$  (EchKan<sup>R</sup>Xbal-fwd / EchKan<sup>R</sup>Xbal-rev), 1425 bp. B – PCR  
 59 products amplified from *D. gigas* wild-type and  $\Delta hynAB$  genomic DNA. Top  
 60 image, amplification of *kanR* gene (HynABKan<sup>R</sup>Sall\_fwd / HynABKan<sup>R</sup>BHI\_rev):  
 61 Lane A- WT, none; Lane B -  $\Delta hynAB$ , 1415bp. Lower image, amplification of the  
 62 deletion site (HynABFlankI\_fwd/ HynABFlank II\_rev): Lane A – WT, 4637bp;  
 63 Lane B -  $\Delta hynAB$ , 3416bp.

64

65 **Table.S1:** Oligonucleotides used for the creation and confirmation of *D. gigas*  
 66 mutant strains.

| <b>Primers</b>                 | <b>Sequence</b>                                        |
|--------------------------------|--------------------------------------------------------|
| <b><i>Δech</i></b>             |                                                        |
| EchFlankI_fwd                  | 5'- GTA CGG ATC CGG TGC TGC GCA TGG CTC C - 3'         |
| EchFlankI_rev                  | 5'- CAG CTC TAG AGA CCT CCC ACC ACC AGC AGC - 3'       |
| Ech Flank II_fwd               | 5'- CGA GTC TAG AGG ATT GAG CCA TGC CCA TCC C - 3'     |
| Ech Flank II_rev               | 5'- CTC AGG GCC CCG GTG TAG TCG TCC AGA ATG G - 3'     |
| EchKan <sup>R</sup> XbaI-fwd   | 5'- GAG TTC TAG ACA GCT ACT GGG CTA TCT G-3'           |
| EchKan <sup>R</sup> XbaI-rev   | 5'- GAG TTC TAG ACT GCA GTT CGG GGG CAT G-3'           |
| EchBC-1                        | 5'- GGG GGC CTC ATC ACC GGC G - 3'                     |
| EchBC-2                        | 5'-GGG GCA GCT TGA ACA GCA TGG - 3'                    |
| <b><i>ΔhynAB</i></b>           |                                                        |
| HynABFlankI_fwd                | 5'- TGA TTA CGC CAA GCT TTC AGG CGG AAG AAT TGG - 3'   |
| HynABFlankI_rev                | 5'- CAG TAG CTG GTC GAC TTA CGT ACC CTC CGT CCT - 3'   |
| HynABFlankII_fwd               | 5'- GAA CTG CAG GGA TCC GTT CCG GAC GCC AGA C - 3'     |
| HynABFlank II_rev              | 5'- CAG TGA ATT CGA GCT CGA TTC TTC GGC TTC CTT G - 3' |
| HynABKan <sup>R</sup> Sall_fwd | 5'- GTC GAC CAG CTA CTG GGC TAT CTG - 3'               |
| HynABKan <sup>R</sup> BHI_rev  | 5'- GGA TCC CTG CAG TTC GGG GGC ATG - 3'               |

67

68 **Table.S2:** Oligonucleotides used in the qRT-PCR expression analyzes for *D.*  
 69 *gigas* wild type and mutant strains.

| <b>Primers</b>         | <b>Sequence</b>                     |
|------------------------|-------------------------------------|
| <b><i>ech</i></b>      |                                     |
| Ech_RT_fwd             | 5'- TCT GGT CCA CCA GCT TCG - 3'    |
| Ech_RT_rev             | 5'- AGG CGG AAG ACA CCA TCC - 3'    |
| <b><i>hynAB</i></b>    |                                     |
| HynAB_RT_fwd           | 5'- CCG ACG AAT ACG ATC TGA AC - 3' |
| HynAB_RT_rev           | 5'- TAC TTG ACG TGC TCC TCG AT - 3' |
| <b><i>16S rRNA</i></b> |                                     |
| 16S_RT_fwd             | 5'- CTC GTG CCG TGA GGT GTT - 3'    |
| 16S_RT_rev             | 5'- TCC CCA CCT TCC TCC TTG - 3'    |

70 **Table.S3:** HPLC quantification of substrates and products from of *D. gigas* wild-type (WT),  $\Delta echBC$  and  $\Delta hynAB$  strains  
71 from growth experiments in basal medium modified from [2] containing: Lactate 40mM/Sulfate 40mM, Pyruvate  
72 40mM/Sulfate 40mM, Pyruvate 40mM/Sulfate\* 5mM, Pyruvate 40mM and H<sub>2</sub>/Sulfate 20mM. Quantifications were  
73 performed after inoculation (~4h) and at the end of stationary phase (~48h). Each data point is the average of three  
74 independent growth experiments. Standard deviation for each value is shown.

| <u>Growth Condition</u>      | <u>Compound</u> | <u>Strains</u> |          |                                |          |                                  |          |
|------------------------------|-----------------|----------------|----------|--------------------------------|----------|----------------------------------|----------|
|                              |                 | <u>WT</u>      |          | <u><math>\Delta ech</math></u> |          | <u><math>\Delta hynAB</math></u> |          |
|                              |                 | 0h             | 48h      | 0h                             | 48h      | 0h                               | 48h      |
| <b>Lactate/Sulfate</b>       | <b>Lactate</b>  | 40.0±0.3       | 0.0±1.4  | 40.4±0.8                       | 0.0±0.2  | 40.5±0.6                         | 0.0±0.2  |
|                              | <b>Sulfate</b>  | 42.2±5.8       | 25.7±5.3 | 40.0±0.3                       | 21.0±3.4 | 43.6±1.5                         | 23.6±3.9 |
|                              | <b>Acetate</b>  | 1.7±0.5        | 42.0±2.9 | 1.2±0.7                        | 39.5±1.5 | 2.0±1.0                          | 42.3±1.5 |
| <b>Pyruvate/Sulfate</b>      | <b>Pyruvate</b> | 45.0±1.7       | 0.0±0.2  | 43.3±5.2                       | 0.0±0.4  | 41.1±3.9                         | 0.0±0.2  |
|                              | <b>Sulfate</b>  | 42.5±4.1       | 34.0±2.7 | 40.2±4.7                       | 32.2±5.9 | 39.0±3.6                         | 31.2±1.3 |
|                              | <b>Acetate</b>  | 2.9±0.3        | 34.5±3.8 | 2.7±0.4                        | 34.9±2.2 | 2.5±1.8                          | 30.7±5.3 |
| <b>Pyruvate/Sulfate*</b>     | <b>Pyruvate</b> | 44.6±6.4       | 0.0±0.2  | 45.3±2.9                       | 0.0±0.4  | 42.0±3.8                         | 0.0±0.2  |
|                              | <b>Sulfate</b>  | 5.3±0.9        | 0.0±0.2  | 5.2±0.7                        | 0.0±0.2  | 5.3±0.8                          | 0.0±0.2  |
|                              | <b>Acetate</b>  | 2.8±0.5        | 32.6±1.0 | 2.7±0.3                        | 31.8±1.7 | 3.0±1.3                          | 29.4±3.9 |
| <b>Pyruvate</b>              | <b>Pyruvate</b> | 41.5±5.5       | 0.0±0.2  | 39.5±8.6                       | 0.0±0.2  | 45.6±6.3                         | 29.3±2.5 |
|                              | <b>Acetate</b>  | 2.6±0.2        | 29.6±3.5 | 2.4±0.2                        | 28.7±4.5 | 2.4±0.6                          | 5.3±5.6  |
| <b>H<sub>2</sub>/Sulfate</b> | <b>Acetate</b>  | 9.9±0.5        | 9.2±0.7  | 10.9±0.5                       | 12.6±1   | -                                | -        |
|                              | <b>Sulfate</b>  | 19.3±0.5       | 16.4±0.5 | 19.2±0.5                       | 16.5±0.5 | -                                | -        |

75 **References**

- 76 1. **Ausubel FM, B.R., Kingston RE, More DD, Seidman JG, Smith JA, Struhl K,**  
77 ed. 1995 Current protocols in molecular biology. Greene Publishing Associates  
78 and Wiley-Intersciences: N.Y.
- 79 2. **Malki, S., G. De Luca, M.L. Fardeau, M. Rousset, J.P. Belaich, and Z.**  
80 **Dermoun.** 1997. Physiological characteristics and growth behavior of single and  
81 double hydrogenase mutants of *Desulfovibrio fructosovorans*. Archives of  
82 Microbiology. **167**(1): 38-45.
